# Supplementary material for: Predictability of human differential gene expression
Source: PubMed Central journal article supplement — Proc Natl Acad Sci U S A. 2019 Mar 7;116(13):6491–500. doi: 10.1073/pnas.1802973116 (PMC6442595; doi:10.1073/pnas.1802973116), 2019-03-07
Supplement: pnas.1802973116.sapp.pdf [file pnas.1802973116.sapp.pdf]

## Supplementary Information

### Predictability of Human Gene Expression Analysis

Megan Crow, Nathaniel Lim, Sara Ballouz, Paul Pavlidis, Jesse Gillis\*

\*Corresponding author: [jgillis@cshl.edu](mailto:jgillis@cshl.edu)

|                                                                                                 |   |
|-------------------------------------------------------------------------------------------------|---|
| Supplementary Figure 1 – Housekeeping gene sets are infrequently differentially expressed.....  | 2 |
| Supplementary Figure 2 – The global DE prior predicts cell type markers from the pancreas ..... | 3 |
| Supplementary Figure 3 – The minimum-rank prior is a robust approximation of the DE prior ..... | 4 |
| Supplementary Figure 4 – Re-interpreting DE genes from meta-analysis .....                      | 5 |
| Supplementary Table 1 – Top gene clusters and GO enrichment .....                               | 6 |
| Supplementary Table 2 – Cancer and transplant rejection datasets.....                           | 7 |

**Note that supplementary datasets S1 and S2 are provided separately**

# Supplementary Figure 1 – Housekeeping gene sets are infrequently differentially expressed

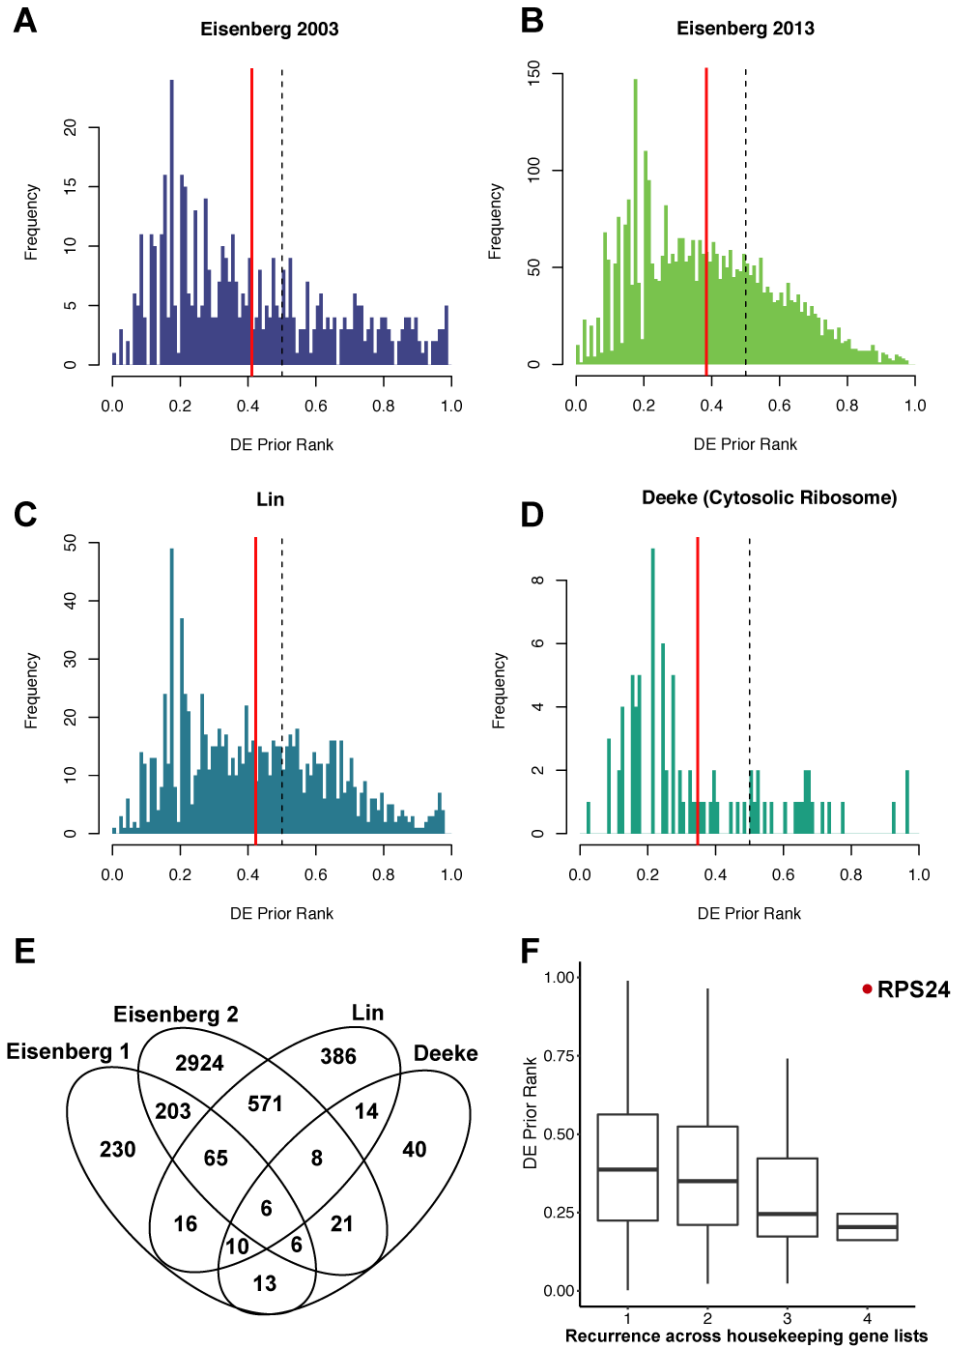

**A-D:** Distribution of DE prior ranks for housekeeping gene sets from bulk microarray (**A**), bulk RNA-seq (**B**), and single cell RNA-seq (**C&D**). In all cases mean ranks are low, confirming that they are infrequently differentially expressed. **E** - Venn diagram of gene overlaps in the four housekeeping sets. Few genes overlap between all four sets. **F** - Boxplot of DE prior rank compared to gene recurrence across housekeeping gene sets. Boxes represent quartiles, and the line is the median, with whiskers extending to 1.5 times the interquartile range. Genes that recur across a greater number of sets tend to have lower DE prior ranks, indicating that they are less commonly DE. RPS24 is a clear outlier to this trend.

## Supplementary Figure 2 – The global DE prior predicts cell type markers from the pancreas

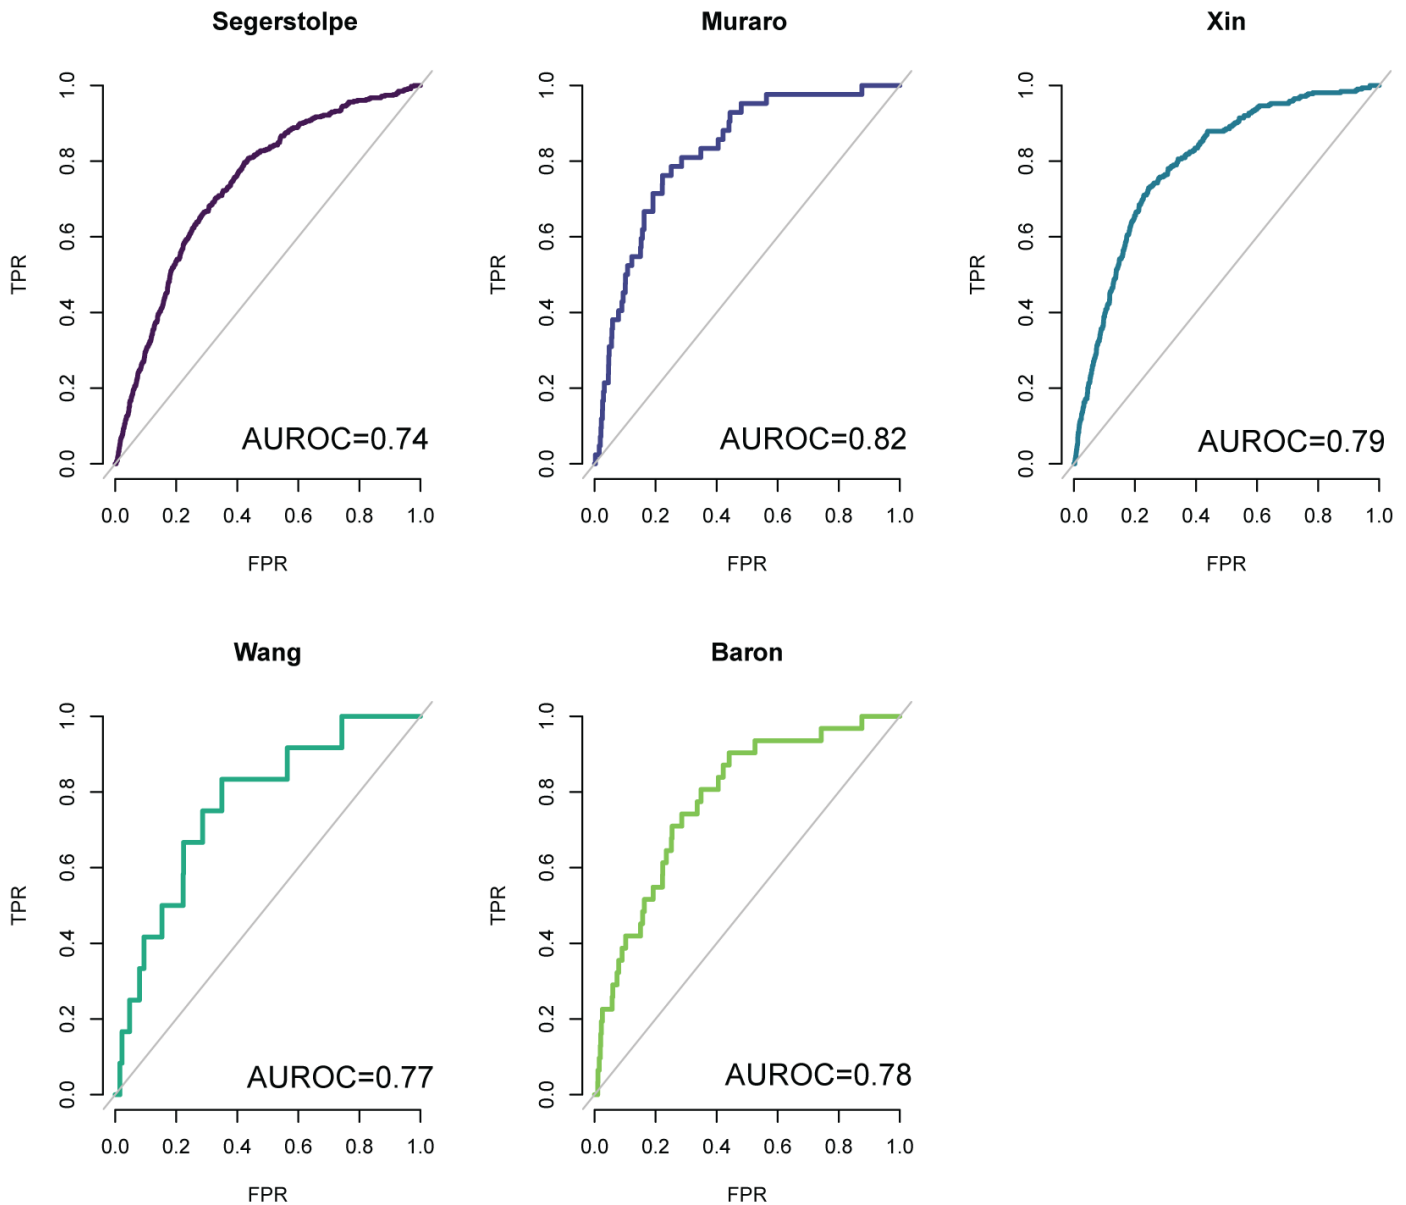

Panels depict DE prior predictions for alpha and beta cell markers from five independent single cell RNA-seq experiments, labeled by the first author of each study. In all cases, the prior has good performance (>0.7) suggesting that it is not overly biased toward studies of disease, cell lines, or other perturbations.

### Supplementary Figure 3 – The minimum-rank prior is a robust approximation of the DE prior

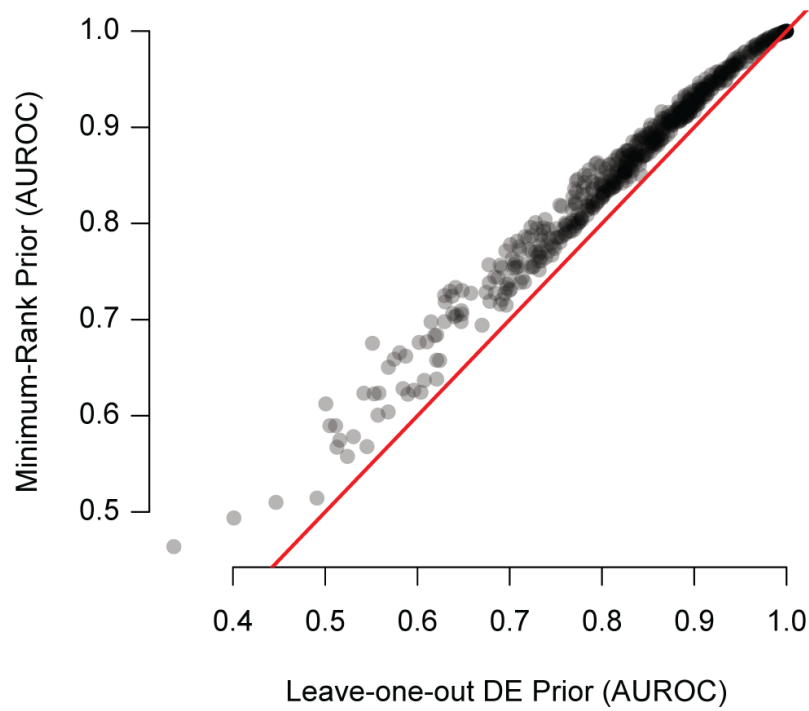

Performance of the minimum-rank prior is plotted with respect to performance of the leave-one-out cross-validated prior, where each point represents a study in the compendium. Mean AUROCs are slightly higher for the minimum-rank prior (0.87 vs 0.83), as expected, but the linearity of the relationship suggests that it appropriately recapitulates the individual DE priors.

## Supplementary Figure 4 – Re-interpreting DE genes from meta-analysis

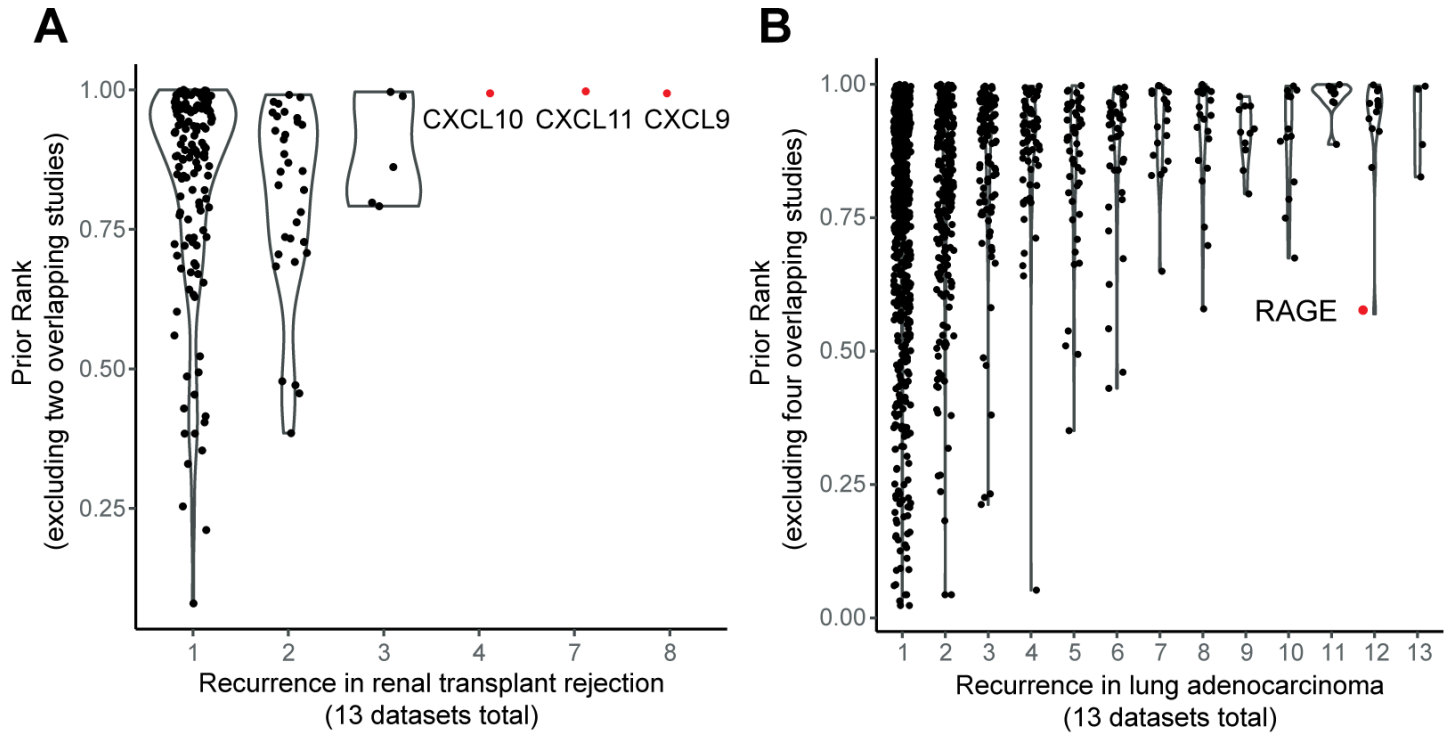

**A** - DE genes from meta-analysis of 13 renal transplant rejection studies are plotted with respect to their prior rank and their recurrence. The prior was generated from the compendium, excluding two studies included in the transplant rejection meta-analysis. Results are consistent with those from the global DE prior (Figure 5C). The only genes that recur among most studies are all very frequently DE. **B** - DE genes from meta-analysis of 13 lung adenocarcinoma studies are plotted with respect to their prior rank and their recurrence. The prior was generated from the compendium, excluding four studies included in the lung cancer meta-analysis. Results are consistent with those from the global DE prior (Figure 5D), with highly recurrent genes showing high prior ranks.

## Supplementary Table 1 – Top gene clusters and GO enrichment

Cluster labels provide a description of the GO terms associated with the genes in the module.

| Cluster Description  | Genes                                                                                                                                                                                                                                                                                                                                                                                                        | Number of Significant GO terms (FDR<0.05) | GO Terms                                                                                                                                     |
|----------------------|--------------------------------------------------------------------------------------------------------------------------------------------------------------------------------------------------------------------------------------------------------------------------------------------------------------------------------------------------------------------------------------------------------------|-------------------------------------------|----------------------------------------------------------------------------------------------------------------------------------------------|
| Extracellular Matrix | ADH1B, ALAS2, BCHE, CD36, CLU, COL1A1, COL1A2, COL3A1, COL11A1, VCAN, CYP1B1, AKR1C2, DPP6, , EBF1, FABP4, FABP7, FN1, GPM6A, HBB, HBD, HOXB3, HOXC6, HPGD, ITGB8, KCNJ2, LPP, LUM, MGP, MME, NDP, OGN, PDK4, RORA, SFRP2, TNS1, WNT5A, XIST, AKR1C3, TSIX, CXCL14, AKAP12, RASGRP1, DHRS2, ABCA8, GPNMB, POSTN, FGL2, SULF1, ABI3BP, EGFL6, AKR1B10, CTHRC1, SESN3, SYNPO2, BOD1L1, H19, MALAT1, ANKRD36BP2 | 100                                       | extracellular matrix, collagen fibril organization, blood vessel development, integrin binding, tissue development, wound healing            |
| Interferon           | BIRC3, TNFRSF17, HLA-DQA1, IFI27, IFIT1, IGHG1, IL7R, CXCL10, CXCL9, MMP12, POU2AF1, RGS1, CCL5, CXCL11, UBD, IFI44, CXCL13, IFI44L, LAMP3, ADAMDEC1, MZB1, FAM46C, RSAD2, ANKRD22, CMPK2, FAM26F, IGLL5                                                                                                                                                                                                     | 130                                       | innate immune response, type I interferon response, chemokine activity, cytokine activity, antigen binding                                   |
| Inflammation         | ADM, ALOX5, ANXA3, AREG, BCL2A1, CD69, CHI3L1, CSTA, DUSP4, EREG, GJB2, CXCL1, CXCL2, CXCL3, HMOX1, HSPA6, IL1B, IL6, CXCL8, KRT19, LCN2, LTF, TACSTD2, MMP1, CEACAM6, NNMT, SERPINB2, SERPINA1, PTGS2, PTX3, RARRES1, S100A8, S100A9, S100A12, CCL2, CCL20, CXCL6, CXCL5, SPP1, TCN1, THBS1, TNFAIP3, TNFAIP6, CXCR4, TFPI2, VNN1, KYNU, SOCS3, GDF15, CRISP3, G0S2, MS4A4A, CHST15, MUCL1, FDCSP           | 223                                       | defense response, neutrophil migration, cell motility, positive regulation of phosphorylation                                                |
| Cell Cycle           | BCAT1, GPX2, MYBL1, RRM2, TOP2A, NMU, SLC7A11, ANLN, PBK, BMS1P20, ASPM                                                                                                                                                                                                                                                                                                                                      | 4                                         | cell cycle, mitotic cell cycle                                                                                                               |
| Stress Response      | ATF3, CA2, HBEGF, DUSP1, DUSP2, DUSP6, EGR1, EGR2, EGR3, FOS, FOSB, HSPA1B, ID1, INSIG1, JUN, MT1E, MT1X, NR4A2, NR4A3, BHLHE40, IER3, KLF4, MAFF, C8orf4, SIK1, C11orf96                                                                                                                                                                                                                                    | 75                                        | transcription regulatory region DNA binding, positive regulation of transcription from RNA polymerase II promoter, response to growth factor |
| Y-chromosome         | UTY, ZFY, KDM5D, USP9Y, DDX3Y, EIF1AY, NLGN4Y, TTTY14, TXLNGY                                                                                                                                                                                                                                                                                                                                                | 0                                         |                                                                                                                                              |

## Supplementary Table 2 – Cancer and transplant rejection datasets

Lung adenocarcinoma and renal transplant rejection datasets re-analyzed for Figure 5 and Supplementary Figure 4. Studies are listed first by phenotype, then in decreasing order based on the total number of samples. Studies that are overlap with the compendium are indicated by a star in the right-most column.

| Phenotype            | Accession | Platform | First Author | N Control | N Cases |   |
|----------------------|-----------|----------|--------------|-----------|---------|---|
| Lung Adenocarcinoma  | GSE31210  | GPL570   | Okayama      | 20        | 226     | * |
| Lung Adenocarcinoma  | GSE32863  | GPL6884  | Selamat      | 58        | 58      |   |
| Lung Adenocarcinoma  | GSE19188  | GPL570   | Hou          | 65        | 45      | * |
| Lung Adenocarcinoma  | GSE43458  | GPL6244  | Kabbout      | 30        | 80      |   |
| Lung Adenocarcinoma  | GSE10072  | GPL96    | Landi        | 49        | 58      |   |
| Lung Adenocarcinoma  | GSE30219  | GPL570   | Rousseaux    | 14        | 85      | * |
| Lung Adenocarcinoma  | GSE43767  | GPL6480  | Feng         | 15        | 69      |   |
| Lung Adenocarcinoma  | GSE63459  | GPL6883  | Robles       | 32        | 33      |   |
| Lung Adenocarcinoma  | GSE7670   | GPL96    | Su           | 27        | 27      |   |
| Lung Adenocarcinoma  | GSE27262  | GPL570   | Wei          | 25        | 25      | * |
| Lung Adenocarcinoma  | GSE12236  | GPL5188  | Xi           | 20        | 20      |   |
| Lung Adenocarcinoma  | GSE2514   | GPL8300  | Stearman     | 19        | 20      |   |
| Lung Adenocarcinoma  | GSE21933  | GPL6254  | Lo           | 21        | 11      |   |
| Transplant Rejection | GSE36059  | GPL570   | Reeve        | 281       | 122     | * |
| Transplant Rejection | GSE48581  | GPL570   | Halloran     | 222       | 78      |   |
| Transplant Rejection | GSE21374  | GPL570   | Einecke      | 206       | 76      |   |
| Transplant Rejection | GSE50058  | GPL570   | Khatri       | 58        | 43      | * |
| Transplant Rejection | GSE22459  | GPL570   | Park         | 25        | 40      |   |
| Transplant Rejection | GSE50084  | GPL6244  | Ó Broin      | 33        | 28      |   |
| Transplant Rejection | GSE44131  | GPL6244  | Hayde        | 12        | 45      |   |
| Transplant Rejection | GSE34748  | GPL570   | Dean         | 36        | 20      |   |
| Transplant Rejection | GSE53605  | GPL571   | Maluf        | 32        | 23      |   |
| Transplant Rejection | GSE9489   | GPL570   | Saint-Mezard | 32        | 15      |   |
| Transplant Rejection | GSE47097  | GPL6883  | Rekers       | 4         | 36      |   |
| Transplant Rejection | GSE65326  | GPL10558 | Toki         | 7         | 16      |   |
| Transplant Rejection | GSE1563   | GPL8300  | Flechner     | 15        | 7       |   |
